# Supplementary material
Source: PubMed Central journal article supplement (PMC5228239)
Supplement: JCM.01403-16_zjm999095316s1.pdf [file JCM.01403-16_zjm999095316s1.pdf]

1 **Supplementary Material**

2

3 Figure S1

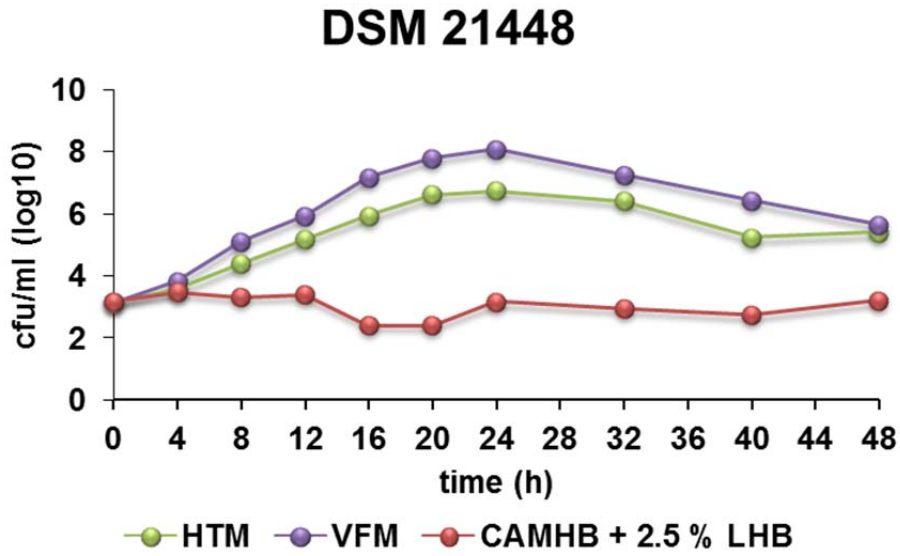

4

5 Colony counts (log<sub>10</sub> cfu/ml) of *H. parasuis* type strain DSM 21448 cultured in  
6 three different media.

7

8 Figure S2

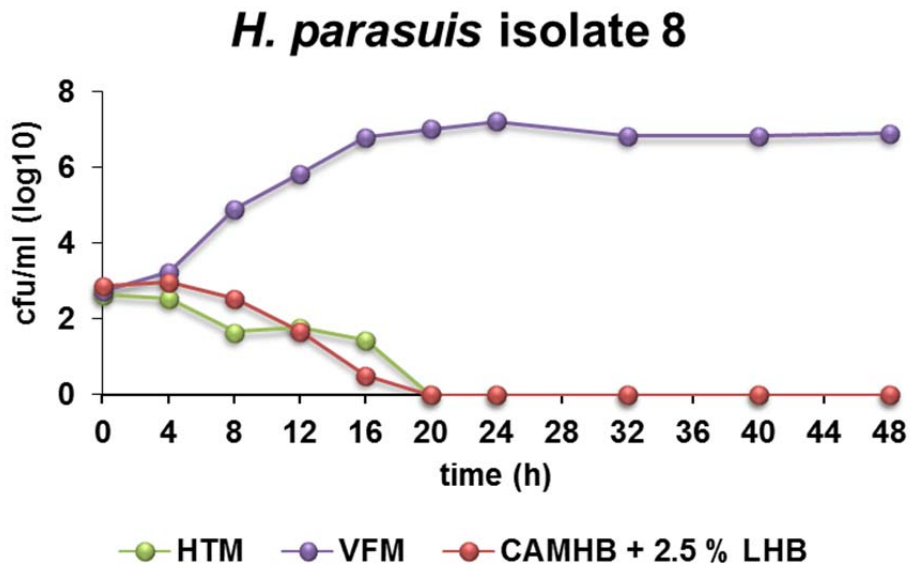

9

10 Colony counts (log<sub>10</sub> cfu/ml) of *H. parasuis* isolate 8 cultured in three different  
11 media.

12

13 Figure S3

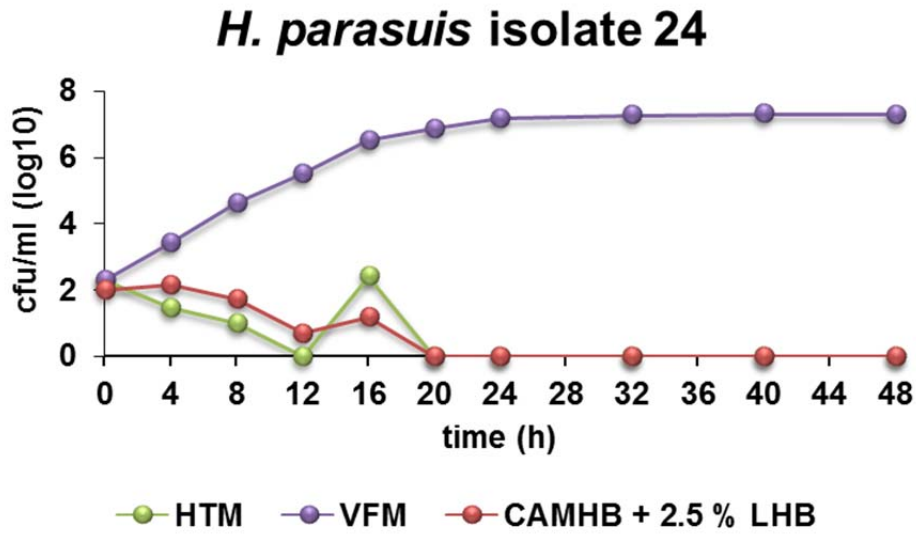

14

15 Colony counts (log<sub>10</sub> cfu/ml) of *H. parasuis* isolate 24 cultured in three different  
16 media

17

18 Figure S4

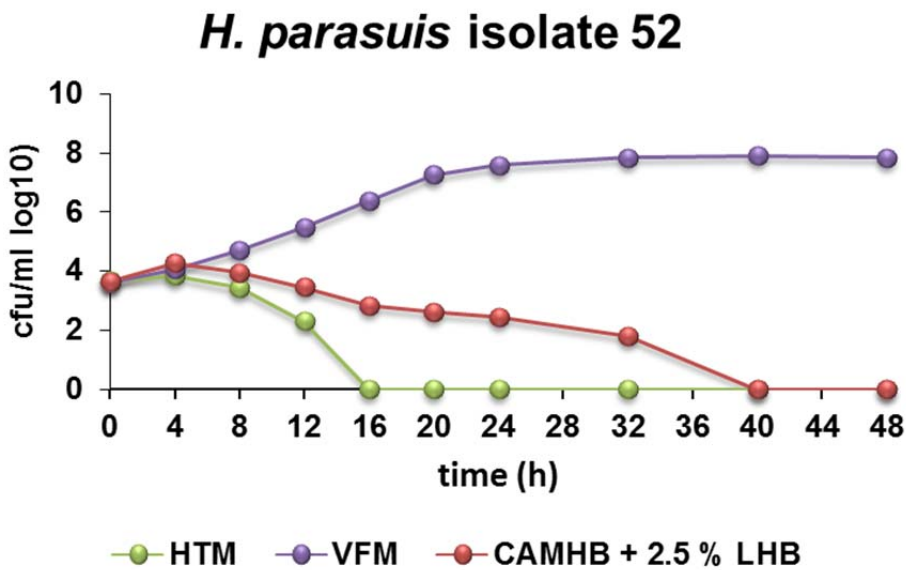

19

20 Colony counts (log<sub>10</sub> cfu/ml) of *H. parasuis* isolate 52 cultured in three different  
21 media.

22

23

24

25

26 Figure S5

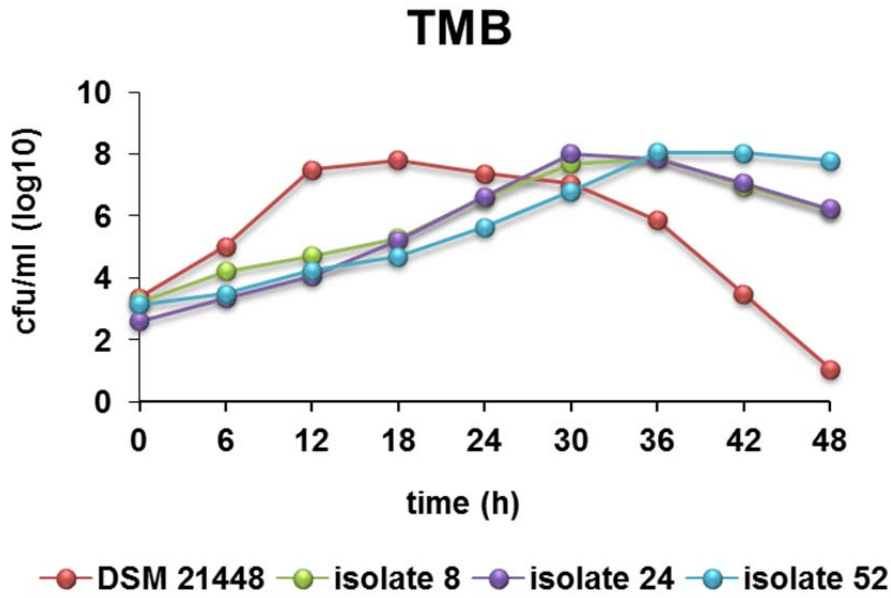

27

28 Colony counts (log<sub>10</sub> cfu/ml) of *H. parasuis* type strain DSM 21448 and three field  
29 isolates cultured in TMB; weighted mean of two independent experiments.

30

31

32

33

34

35 Figure S6

36

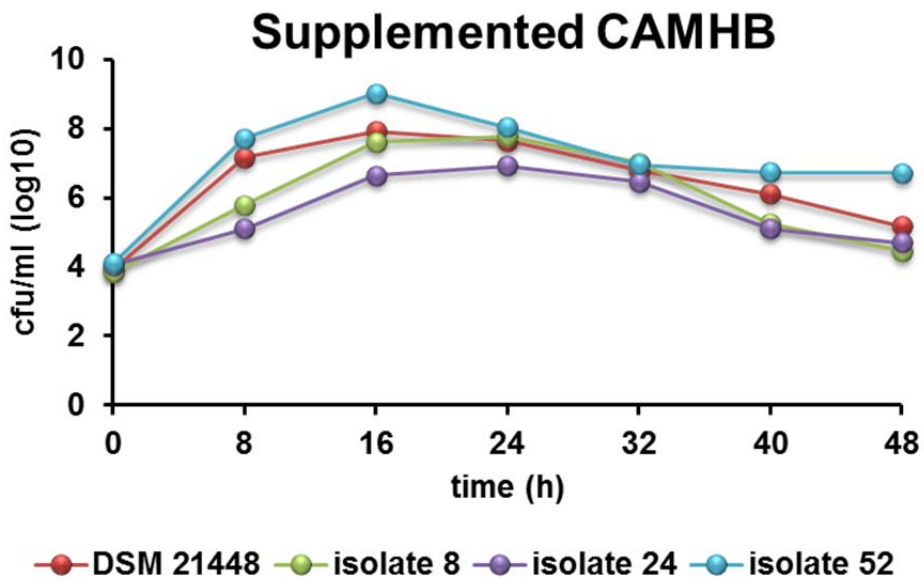

37

38

39 Colony counts (log<sub>10</sub> cfu/ml) of *H. parasuis* type strain DSM 21448 and three field  
40 isolates cultured in supplemented CAMHB.

41

42

43 Table S1: MIC distribution of 47 *H. parasuis* isolates after 24 hours incubation time in TMB.

| TMB<br>Antimicrobial agent                         | Number of isolates with MIC ( $\mu\text{g/ml}$ ) value of (24 h incubation) |       |      |      |      |      |     |    |    |    |    |    |    |    |     |     |     | MIC <sub>50</sub> | MIC <sub>90</sub> |             |
|----------------------------------------------------|-----------------------------------------------------------------------------|-------|------|------|------|------|-----|----|----|----|----|----|----|----|-----|-----|-----|-------------------|-------------------|-------------|
|                                                    | 0.008                                                                       | 0.015 | 0.03 | 0.06 | 0.12 | 0.25 | 0.5 | 1  | 2  | 4  | 8  | 16 | 32 | 64 | 128 | 256 | 512 |                   |                   | 1024        |
| Ampicillin                                         |                                                                             |       | 14*  | 7    | 10   | 10   | 4   | 1  |    |    |    |    |    | 1  |     |     |     |                   | 0.12              | 0.5         |
| Amoxicillin/clavulanic acid 2:1 ratio <sup>a</sup> |                                                                             |       | 6*   | 18   | 11   | 9    | 2   | 1  |    |    |    |    |    |    |     |     |     |                   | 0.06              | 0.25        |
| Ceftiofur                                          |                                                                             |       | 47*  |      |      |      |     |    |    |    |    |    |    |    |     |     |     |                   | $\leq 0.03$       | $\leq 0.03$ |
| Cefquinome                                         |                                                                             | 37*   | 6    | 3    | 1    |      |     |    |    |    |    |    |    |    |     |     |     |                   | $\leq 0.015$      | 0.03        |
| Cefoperazone                                       |                                                                             |       |      | 46*  | 1    |      |     |    |    |    |    |    |    |    |     |     |     |                   | $\leq 0.06$       | $\leq 0.06$ |
| Cefotaxime                                         |                                                                             | 42*   | 5    |      |      |      |     |    |    |    |    |    |    |    |     |     |     |                   | $\leq 0.015$      | 0.03        |
| Ciprofloxacin                                      | 39*                                                                         | 2     | 3    | 2    |      |      |     |    |    | 1  |    |    |    |    |     |     |     | $\leq 0.008$      | 0.03              |             |
| Colistin                                           |                                                                             |       | 5*   | 7    | 19   | 8    | 1   |    | 3  | 4  |    |    |    |    |     |     |     | 0.12              | 2                 |             |
| Doxycycline                                        |                                                                             |       |      | 10*  | 12   | 16   | 4   |    | 3  | 2  |    |    |    |    |     |     |     | 0.25              | 2                 |             |
| Enrofloxacin                                       | 36*                                                                         | 5     | 2    | 3    |      |      |     |    |    |    | 1  |    |    |    |     |     |     | $\leq 0.008$      | 0.03              |             |
| Florfenicol                                        |                                                                             |       |      |      | 18*  | 25   | 4   |    |    |    |    |    |    |    |     |     |     | 0.25              | 0.25              |             |
| Gentamicin                                         |                                                                             |       |      |      |      | 1    | 6   | 10 | 28 | 2  |    |    |    |    |     |     |     | 2                 | 2                 |             |
| Imipenem                                           |                                                                             | 10*   | 10   | 15   | 12   |      |     |    |    |    |    |    |    |    |     |     |     | 0.06              | 0.12              |             |
| Nalidixic acid                                     |                                                                             |       |      |      |      |      | 8   | 25 | 6  | 1  | 1  | 4  | 1  | 1  |     |     |     | 1                 | 16                |             |
| Neomycin                                           |                                                                             |       | 3    | 3    |      |      | 1   |    | 6  | 8  | 21 | 5  |    |    |     |     |     | 8                 | 16                |             |
| Penicillin                                         |                                                                             | 12*   | 4    | 3    | 5    | 11   | 7   | 4  |    |    |    | 1  |    |    |     |     |     | 0.12              | 1                 |             |
| Streptomycin                                       |                                                                             |       |      |      |      |      |     |    | 8  | 20 | 11 | 3  | 1  | 1  |     |     |     | 3*                | 8                 | 64          |
| Tiamulin                                           |                                                                             |       |      |      | 1    | 1    | 4   | 9  | 13 | 16 | 3  |    |    |    |     |     |     | 2                 | 4                 |             |
| Tetracycline                                       |                                                                             |       |      |      | 9*   | 8    | 10  | 12 | 1  |    | 2  | 5  |    |    |     |     |     | 0.5               | 16                |             |
| Tilmicosin                                         |                                                                             |       |      |      | 1    | 4    | 12  | 15 | 10 | 4  |    |    |    | 1  |     |     |     | 1                 | 4                 |             |
| Trimethoprim/sulfa-methoxazole (1:19) <sup>b</sup> |                                                                             | 3*    | 6    | 2    |      | 5    | 14  | 9  | 2  | 6  |    |    |    |    |     |     |     | 0.5               | 4                 |             |

44 <sup>a</sup>Data represent the concentration of amoxicillin; <sup>b</sup>Data represent the concentration of trimethoprim. \*Asterisked numbers demonstrate the number of isolates with  
 45 MIC values equal to or higher/lower than concentrations of the tested range. The tested range of the antimicrobials agents is represented in the white area.
